# Supplementary material
Source: Springer Nature journal article supplement (https://www.springermedizin.de/resource/supplementary/13014_2012_704_MOESM1_ESM.pdf/9634040)
Supplement: MOESM1 [file 9634040]

# Development of Clinically Relevant Radiation Modifiers: Models

## *In Vitro*

### Advantages:

- Experimental expediency
- Relatively limited resources required
- Ideal for mechanistic causal studies

### Disadvantages:

- Does not account for potential influences of microenvironment on radiosensitivity and its modification

## Ectopic Xenograft (Leg)

### Advantages:

- Begins to account for *in vivo* microenvironment
- Straightforward tumor volume measurement
- Can deliver high radiation doses without injury to critical organs

### Disadvantages:

- Unlikely to simulate the *in situ* tumor phenotype

## Orthotopic Xenograft

### Advantages:

- Microenvironment more closely simulates the *in situ* tumor

### Disadvantages:

- Implantation more difficult
- Tumor response requires imaging or survival
- Limited to organs in radiation field
